# Supplementary material for: Insight into the Role and Regulation of Gap Junction Genes in Lung Cancer and Identification of Nuclear Cx43 as a Putative Biomarker of Poor Prognosis
Source: Cancers (Basel). 2019 Mar 6;11(3):320. doi: 10.3390/cancers11030320 (PMC6468764; doi:10.3390/cancers11030320)
Supplement: Supplementary file 1 [file cancers-11-00320-s001.zip › cancers-453559-Supplementary Tables.xlsm]

## Sheet: Table S1
Supplementary Table S1. Correlation between HR survival curves between Microarray based versus RNA-seq based analysis.
		HR Array LUSC	HR RNA- seq LUSC	Dis-Cordance	HR Array LUAD	HR RNA- seq LUAD	Dis-Cordance
Gene	Connexin
GJA1	Cx43	0,78	0.85		0,64	1.34	**
GJA3	Cx46	0,77	0.75		1,48	1.2
GJA4	Cx37	0,83	1.43	*	0,67	1.28	**
GJA5	Cx40	1,20	1.58		1,86	0.7	**
GJA8	Cx50	1,16	0.73	*	0,60	0.8
GJA10	Cx62	0,77	0.73		1,62	1.57
GJB1	Cx32	1,38	1.38		0,60	0.79
GJB3	CX31	1,27	1.24		2,39	1.94
GJB4	Cx30.3	1,18	0.84	*	1,88	1.59
GJB5	Cx31.1	1,12	0.77	*	1,63	1.49
GJB6	Cx30	0,75	0.77		0,82	1.35	*
GJB2	Cx26	0,87	0.7		2,12	2.09
GJC1	Cx45	1,22	0.78	*	0,66	1.41	**
GJC2	Cx47	0,81	1.34	*	1,45	0.7	**
GJC3	Cx30.2	0,78	1.34	*	1,76	1.43
GJD2	Cx36	1,14	1.46		2,13	0.82	**
GJD3	Cx31.9	0,66	1.49	***	1,26	1.23
GJD4	Cx40.1	0,83	0.86		1,49	0.8	**
1 Abbreviations: HR; hazard ratio, LUSC; squamous cell lung cancer, LUAD; Adeno Carcinoma lung cancer, 2 The table depicts the patient hazard ratio, where the cohort expressing high levels of connexin mRNA is either associated with better survival (depicted in green, HR less than 1, i.e., less chance of death) or with worse survival (red, HR greater than 1, i.e., higher chance of death). Those as…

## Sheet: Table S2
Correlations
		sexM0F1	Age	LUSC (1) vs LUAD (2)	GRADE	cm	T	N	M	Ki67	Cx43-Nuclear	Cx43MC1	Cx43MC2	Cx43MC1N	Cx43MC2N
sexM0F1	Pearson Correlation	1	-0.143348	,288*	-,277*	-0.119494	-0.17725	-0.0632686	0.0613925	-,386**	0.159139	0.0235756	-0.0742108	0.0184697	0.00932862
	Sig. (2-tailed)		0.226323	0.0134627	0.0192202	0.313959	0.142124	0.602831	0.613647	0.00125663	0.178689	0.84306	0.532644	0.876747	0.937566
	N	73	73	73	71	73	70	70	70	67	73	73	73	73	73
Age	Pearson Correlation	-0.143348	1	-,318**	0.219897	-0.0224218	-0.0699876	0.00867595	-,240*	0.149109	-0.180814	0.0407809	0.0971835	0.0272085	0.149736
	Sig. (2-tailed)	0.226323		0.00607496	0.065385	0.85065	0.564803	0.943173	0.0457636	0.22848	0.125804	0.731929	0.41339	0.819258	0.206085
	N	73	73	73	71	73	70	70	70	67	73	73	73	73	73
Tumour_Subtype	Pearson Correlation	,288*	-,318**	1	-,267*	-0.112385	-0.055476	0.14133	-0.160621	-,525**	0.196549	-,345**	-,492**	-,270*	-,353**
	Sig. (2-tailed)	0.0134627	0.00607496		0.0246028	0.343819	0.64829	0.243198	0.18408	4.98146e-06	0.0955874	0.00280476	9.75331e-06	0.0207746	0.00218513
	N	73	73	73	71	73	70	70	70	67	73	73	73	73	73
GRADE	Pearson Correlation	-,277*	0.219897	-,267*	1	0.139772	0.197607	0.158977	0.0123642	,383**	-0.0997074	0.0908585	0.201571	-0.00184891	0.164504
	Sig. (2-tailed)	0.0192202	0.065385	0.0246028		0.24501	0.106252	0.195352	0.920288	0.00163748	0.408066	0.451114	0.0918598	0.987791	0.170408
	N	71	71	71	71	71	68	68	68	65	71	71	71	71	71
cm	Pearson Correlation	-0.119494	-0.0224218	-0.112385	0.139772	1	,634**	,292*	0.0310708	0.039471	0.0924967	0.0811725	0.086141	0.121375	0.158408
	Sig. (2-tailed)	0.313959	0.85065	0.343819	0.24501		3.76994e-09	0.0143292	0.798462	0.751147	0.436379	0.494799	0.468676	0.306348	0.180718
	N	73	73	73	71	73	70	70	70	67	73	73	73	73	73
T	Pearson Correlation	-0.17725	-0.0699876	-0.055476	0.197607	,634**	1	,319**	0.208396	0.107669	0.0432043	-0.107512	0.134774	-0.115847	0.0817747
	Sig. (2-tailed)	0.142124	0.564803	0.64829	0.106252	3.76994e-09		0.00715255	0.0834105	0.397085	0.722492	0.375678	0.265975	0.339569	0.500957
	N	70	70	70	68	70	70	70	70	64	70	70	70	70	70
N	Pearson Correlation	-0.0632686	0.00867595	0.14133	0.158977	,292*	,319**	1	-0.0256358	-0.00173081	0.0169051	-0.0575169	-0.00721012	-0.0607001	0.0539556
	Sig. (2-tailed)	0.602831	0.943173	0.243198	0.195352	0.0143292	0.00715255		0.833155	0.98917	0.889528	0.63625	0.952762	0.61766	0.657317
	N	70	70	70	68	70	70	70	70	64	70	70	70	70	70
M	Pearson Correlation	0.0613925	-,240*	-0.160621	0.0123642	0.0310708	0.208396	-0.0256358	1	0.0978581	-0.152845	0.110506	0.169311	0.0863868	0.0287956
	Sig. (2-tailed)	0.613647	0.0457636	0.18408	0.920288	0.798462	0.0834105	0.833155		0.441725	0.206517	0.362449	0.161157	0.477034	0.812942
	N	70	70	70	68	70	70	70	70	64	70	70	70	70	70
Ki67	Pearson Correlation	-,386**	0.149109	-,525**	,383**	0.039471	0.107669	-0.00173081	0.0978581	1	-0.151318	,253*	,260*	0.0784496	0.15088
	Sig. (2-tailed)	0.00125663	0.22848	4.98146e-06	0.00163748	0.751147	0.397085	0.98917	0.441725		0.221582	0.0392515	0.0339397	0.528023	0.222937
	N	67	67	67	65	67	64	64	64	67	67	67	67	67	67
Cx43-Nuclear	Pearson Correlation	0.159139	-0.180814	0.196549	-0.0997074	0.0924967	0.0432043	0.0169051	-0.152845	-0.151318	1	0.0242463	-0.0733896	,296*	,587**
	Sig. (2-tailed)	0.178689	0.125804	0.0955874	0.408066	0.436379	0.722492	0.889528	0.206517	0.221582		0.838655	0.537201	0.0109106	4.90766e-08
	N	73	73	73	71	73	70	70	70	67	73	73	73	73	73
Cx43MC1	Pearson Correlation	0.0235756	0.0407809	-,345**	0.0908585	0.0811725	-0.107512	-0.0575169	0.110506	,253*	0.0242463	1	,345**	,783**	,296*
	Sig. (2-tailed)	0.84306	0.731929	0.00280476	0.451114	0.494799	0.375678	0.63625	0.362449	0.0392515	0.838655		0.00280476	2.57444e-16	0.0109781
	N	73	73	73	71	73	70	70	70	67	73	73	73	73	73
Cx43MC2	Pearson Correlation	-0.0742108	0.0971835	-,492**	0.201571	0.086141	0.134774	-0.00721012	0.169311	,260*	-0.0733896	,345**	1	,270*	,535**
	Sig. (2-tailed)	0.532644	0.41339	9.75331e-06	0.0918598	0.468676	0.265975	0.952762	0.161157	0.0339397	0.537201	0.00280476		0.0207746	1.0818e-06
	N	73	73	73	71	73	70	70	70	67	73	73	73	73	73
Cx43MC1N	Pearson Correlation	0.0184697	0.0272085	-,270*	-0.00184891	0.121375	-0.115847	-0.0607001	0.0863868	0.0784496	,296*	,783**	,270*	1	,505**
	Sig. (2-tailed)	0.876747	0.819258	0.0207746	0.987791	0.306348	0.339569	0.61766	0.477034	0.528023	0.0109106	2.57444e-16	0.0207746		5.18705e-06
	N	73	73	73	71	73	70	70	70	67	73	73	73	73	73
Cx43MC2N	Pearson Correlation	0.00932862	0.149736	-,353**	0.164504	0.158408	0.0817747	0.0539556	0.0287956	0.15088	,587**	,296*	,535**	,505**	1
	Sig. (2-tailed)	0.937566	0.206085	0.00218513	0.170408	0.180718	0.500957	0.657317	0.812942	0.222937	4.90766e-08	0.0109781	1.0818e-06	5.18705e-06
	N	73	73	73	71	73	70	70	70	67	73	73	73	73	73
*. Correlation is significant at the 0.05 level (2-tailed).
**. Correlation is significant at the 0.01 level (2-tailed).
Cx43MC1: mild, moderate or strong Cx43 intensity with membrane/cytoplasmic localization
Cx43MC2: moderate or strong Cx43 intensity with membrane/cytoplasmic localization
Cx43MC1N: mild, moderate or strong Cx43 intensity with membrane/cytoplasmic localization OR any Cx43 Nuclear positive staining
Cx43MC2N: moderate or strong Cx43 intensity with membrane/cytoplasmic localization OR any Cx43 Nuclear positive staining
All immunohistochemistry is set to present (1) / abstent (0) score except Ki67 which is scored as percentage positive cells
LUSC is scored as 1 and LUAD as 2.
